# Supplementary material for: Loss of Myostatin Alters Mitochondrial Oxidative Phosphorylation, TCA Cycle Activity, and ATP Production in Skeletal Muscle
Source: MDPI journal article supplement (doi:10.3390/ijms232415707), 2022-12-11
Supplement: s1 [file s1]

## Supplementary Materials

### Supplementary Figures

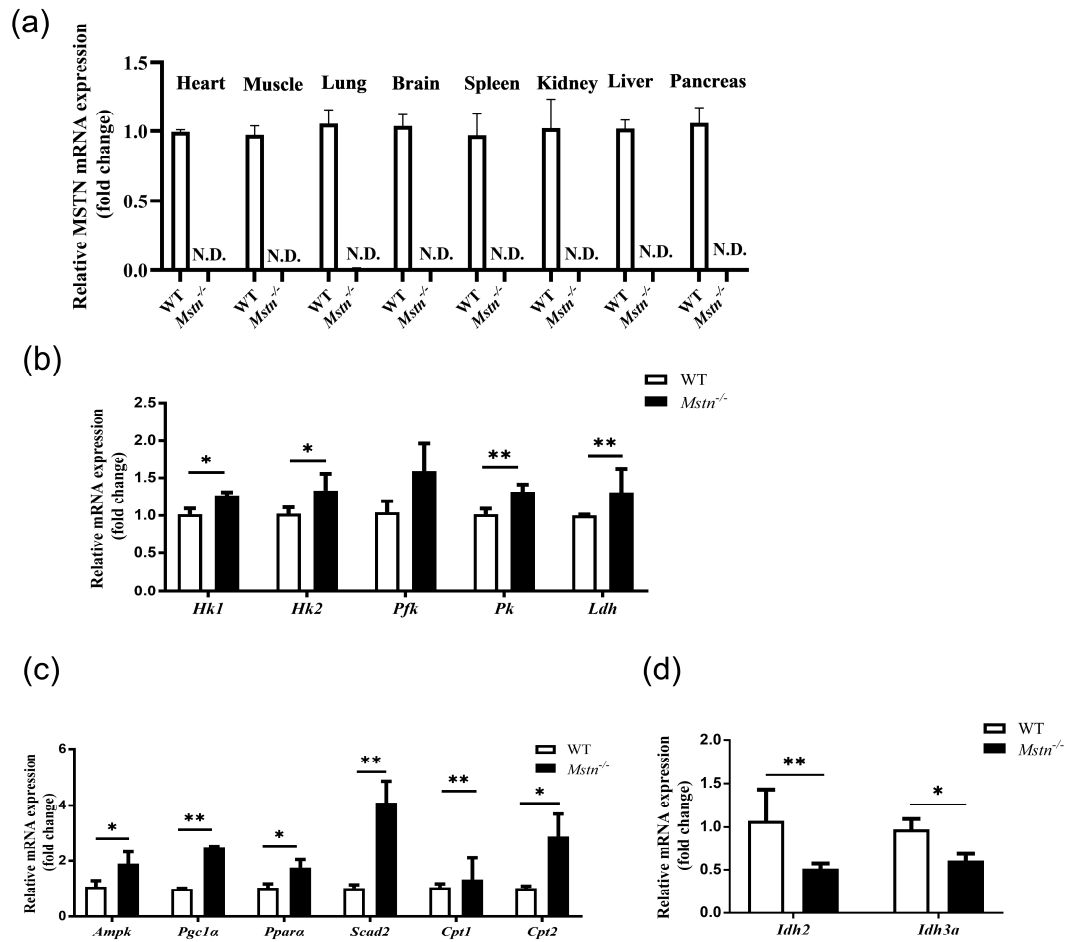

**Figure S1.** The mRNA expression of genes involved in energy metabolism in quadriceps of *Mstn*<sup>-/-</sup> and WT mice (the reference gene is  $\alpha$ -tubulin). (a) Real-time PCR analyses of *Mstn* expression in different organs. N.D., not detectable. (b) Expression of mRNA for key rate-limiting enzymes involved in glycolysis in quadriceps. (c) Expression of mRNA for gene involved in  $\beta$ -oxidation in quadriceps. (d) Expression of mRNA for IDH. All data are presented as mean  $\pm$  SD. Compared with the control group, \* $p$  < 0.05, \*\* $p$  < 0.01, Student's t-tests were used to calculate the  $p$ -values. We used  $n=6$  mice per group. Except where noted, each dot presents a mouse.

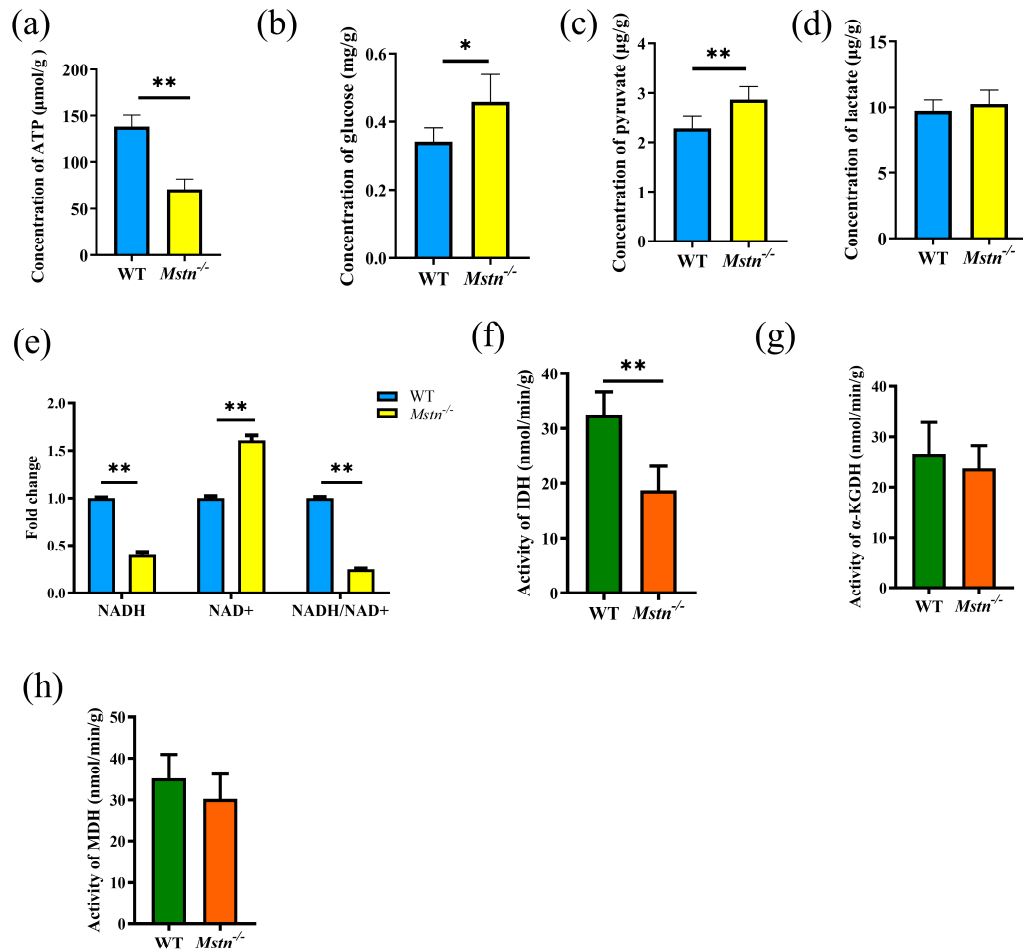

**Figure S2.** Enzyme activity and metabolite content related to energy metabolism in quadriceps muscle of *Mstn*<sup>-/-</sup> and WT mice (normalized by weight). (a-e) Concentrations of ATP, glucose, pyruvate, lactate, NADH, NAD<sup>+</sup> in quadriceps of WT and *Mstn*<sup>-/-</sup> mice. (f-h) Activities of IDH, α-KGDH, MDH in quadriceps of WT and *Mstn*<sup>-/-</sup> mice. All data are presented as mean ± SD. Compared with the control group, \**p* < 0.05, \*\**p* < 0.01, Student's t-tests were used to calculate the *p*-values. We used n=6 mice per group. Except where noted, each dot presents a mouse.

### Supplementary Tables

Table S1. The weight of different muscles from wild-type and *Mstn*<sup>-/-</sup> mice

| Weight (mg)                    | Soleus     | Plantaris   | Gastrocnemius | Tibialis anterior | Quadriceps      |
|--------------------------------|------------|-------------|---------------|-------------------|-----------------|
| WT (♂)                         | 6.13±0.33  | 13.59±0.79  | 139.89±5.22   | 60.95±5.44        | 219.41±9.14     |
| <i>Mstn</i> <sup>-/-</sup> (♂) | 6.86±0.66* | 15.63±1.52* | 155.75±6.81** | 77.56±8.4**       | 261.77±16.43*** |
| WT (♀)                         | 5.23±0.28  | 12.01±0.75  | 124.31±6.27   | 53.65±4.73        | 195.63±15.32    |

*Mstn*<sup>-/-</sup> (♀)      5.74±0.39\*      12.77±0.57      133.41±2.81\*\*      62.51±7.62\*      218.46±9.25\*

N=6 mice per group; 8 weeks old; Different from control, t-test \**p* < 0.05, \*\**p* < 0.01, \*\*\**p* < 0.001

Table S2. Organ and body weights from wild-type and *Mstn*<sup>-/-</sup> mice

| Weight (g)                     | Body        | Heart      | Kidney     | Liver      | Spleen    | Lung      | Brain     | Ovary     | Testis    |
|--------------------------------|-------------|------------|------------|------------|-----------|-----------|-----------|-----------|-----------|
| WT (♂)                         | 27.16±0.57  | 0.2±0.02   | 0.41±0.03  | 1.23±0.12  | 0.10±0.02 | 0.20±0.01 | 0.41±0.02 | —         | 0.17±0.03 |
| <i>Mstn</i> <sup>-/-</sup> (♂) | 31.29±1.06* | 0.25±0.02* | 0.48±0.05* | 1.43±0.06* | 0.08±0.03 | 0.21±0.02 | 0.39±0.01 | —         | 0.15±0.01 |
| WT (♀)                         | 25.99±0.89  | 0.16±0.03  | 0.42±0.02  | 1.38±0.14  | 0.10±0.01 | 0.21±0.01 | 0.42±0.02 | 0.01±0.00 | —         |
| <i>Mstn</i> <sup>-/-</sup> (♀) | 29.54±3.29* | 0.21±0.01* | 0.45±0.02* | 1.72±0.20* | 0.10±0.05 | 0.20±0.1  | 0.42±0.02 | 0.01±0.01 | —         |

N=6 mice per group; 8 weeks old; \*Different from control, t-test *p* < 0.05

Table S3 PCR primers used for the third exon of *Mstn* amplification

| Gene            | Forward Primer (5'-3') | Reverse Primer (5'-3') |
|-----------------|------------------------|------------------------|
| <i>Mstn</i> 3ex | AGTCAAGGTGACAGACACACCC | GTGCTTGAATTCACAGTTTCGA |

Table S4 Primers of Real-time qPCR

| Gene             | Forward Primer (5'-3')  | Reverse Primer (5'-3')  |
|------------------|-------------------------|-------------------------|
| <i>Rpl7l1</i>    | ACGGTGGAGCCTTATGTGAC    | TCCGTCAGAGGGACTGTCTT    |
| <i>α-tubulin</i> | TGTCCTGGACAGGATTTCG     | CTCCATCAGCAGGGAGGTG     |
| <i>Mstn</i>      | AGTGGATCTAAATGAGGGCAGT  | GTTTCCAGGCGCAGCTTAC     |
| <i>Myh7</i>      | AGTCCCAGGTCAACAAGCTG    | TTCCACCTAAAGGGCTGTTG    |
| <i>Myh2</i>      | AGTCCCAGGTCAACAAGCTG    | GCATGACCAAAGGTTTCACA    |
| <i>Myh1</i>      | AGTCCCAGGTCAACAAGCTG    | CACATTTTGCTCATCTCTTTG   |
| <i>Myh4</i>      | AGTCCCAGGTCAACAAGCTG    | TTTCTCCTGTCACCTCTCAACA  |
| <i>Hk1</i>       | CAAGAAATTACCCGTGGGATTCA | CAATGTTAGCGTCATAGTCCCC  |
| <i>Hk2</i>       | CTAAGGGGTTCAAGTCCAGTGG  | AGACCAATCTCGCAGTTCTGA   |
| <i>Pfk1</i>      | GCGACTTGCTGAATGATCTCC   | CATTGTCGATTGAGCCAACCA   |
| <i>Pk</i>        | GAACATTGCACGACTCAACTTC  | CAGTGCATATCTCGGGACC     |
| <i>Ldh</i>       | CAAAGACTACTGTGTAAGTGC   | TGGACTGTACTTGACAATGTTGG |

|              |                           |                          |
|--------------|---------------------------|--------------------------|
| <i>Scad</i>  | TTGCCGAGAAGGAGTTGGTC      | AGGTAATCCAAGCCTGCACC     |
| <i>Cpt1</i>  | TGTCTACCTCCGAAGCAGGA      | GCCATGACCGGCTTGATCT      |
| <i>Cpt2</i>  | TGACAGCCAGTTCAGGAAGAC     | GGCCTGAGATGTAGCTGGTG     |
| <i>Ampk</i>  | GTCATGATAGCTTGCATAAATGGTG | AGTTGAATAGAACAAGCCCTGGAC |
| <i>Pgc1a</i> | CATTTGATGCACTGACAGATGGA   | CCGTCAGGCATGGAG GAA      |
| <i>Ppara</i> | GGCAAAAGGCAAGGAGAAGCA     | GGGAAAGAGGTGAGAGAAGAGC   |

Table S5 Primers of CHIP-qPCR

| <b>Gene</b>  | <b>Forward Primer (5'-3')</b> | <b>Reverse Primer (5'-3')</b> |
|--------------|-------------------------------|-------------------------------|
| <i>Idh2</i>  | GTGTCACTGGGTGGAGGT            | TTACTTAGGGCTGGCTTAC           |
| <i>Idh3a</i> | AGTGCTTCATGGCTTCAT            | GGTTAGGTGCTTGTTTCA            |
